# Supplementary material for: The Sustainability of Sweet Potato Residues from Starch Processing By-Products: Preparation with Lacticaseibacillus rhamnosus and Pediococcus pentosaceus, Characterization, and Application
Source: MDPI journal article supplement (doi:10.3390/foods12010128), 2022-12-27
Supplement: s1 [file s1]

**Table S1** Total and free amino acids of sweet potato residues fermented with combined strains

|                  | Total amino acids (mg/100 g DW) |            | Free amino acids (mg/100 g DW) |            |
|------------------|---------------------------------|------------|--------------------------------|------------|
|                  | SPR                             | FSPR       | SPR                            | FSPR       |
| Asp <sup>Δ</sup> | 0.51±0.05                       | 0.46±0.02  | 0.11±0.01                      | 0.12±0.06  |
| Thr <sup>'</sup> | 0.18±0.01                       | 0.19±0.01  | 0.07±0.01                      | 0.07±0.01  |
| Ser              | 0.18±0.01                       | 0.18±0.00  | 0.06±0.00                      | 0.07±0.01  |
| Glu <sup>Δ</sup> | 0.32±0.02                       | 0.30±0.02  | 0.17±0.00                      | 0.10±0.01  |
| Gly <sup>Δ</sup> | 0.15±0.01                       | 0.14±0.00  | 0.03±0.00                      | 0.04±0.01  |
| Ala <sup>Δ</sup> | 0.17±0.01                       | 0.18±0.01  | 0.11±0.03                      | 0.08±0.02  |
| Cys              | 0.00±0.00                       | 0.00±0.00  | 0.01±0.00                      | 0.01±0.00  |
| Val <sup>'</sup> | 0.19±0.03                       | 0.18±0.00  | 0.07±0.01                      | 0.06±0.01  |
| Met <sup>'</sup> | 0.01±0.01                       | 0.01±0.01  | 0.01±0.00                      | 0.01±0.00  |
| Ile <sup>'</sup> | 0.16±0.02                       | 0.14±0.02  | 0.00±0.00                      | 0.00±0.00  |
| Leu <sup>'</sup> | 0.24±0.04                       | 0.21±0.02  | 0.08±0.01                      | 0.08±0.02  |
| Tyr              | 0.15±0.04                       | 0.10±0.05  | 0.03±0.00                      | 0.04±0.00  |
| Phe <sup>'</sup> | 0.19±0.01                       | 0.15±0.01  | 0.08±0.03                      | 0.06±0.00  |
| Lys <sup>'</sup> | 0.20±0.00                       | 0.18±0.01  | 0.06±0.00                      | 0.06±0.01  |
| His <sup>'</sup> | 0.07±0.02                       | 0.07±0.01  | 0.02±0.00                      | 0.03±0.01  |
| Arg              | 0.12±0.09                       | 0.17±0.02  | 0.04±0.00                      | 0.07±0.01  |
| Pro              | 0.10±0.03                       | 0.13±0.01  | 0.06±0.00                      | 0.06±0.01  |
| ΣAA              | 2.94±0.03                       | 2.78±0.12  | 0.98±0.07                      | 0.94±0.06  |
| FAA <sup>Δ</sup> | 1.16±0.09                       | 1.08±0.06  | 0.40±0.04                      | 0.35±0.04  |
| EAA <sup>'</sup> | 1.23±0.05                       | 1.12±0.07  | 0.38±0.03                      | 0.37±0.02  |
| NEAA             | 1.70±0.02                       | 1.66±0.05  | 0.63±0.04                      | 0.59±0.09  |
| EAA/ΣAA          | 41.84±1.23                      | 40.36±0.80 | 38.76±0.11                     | 39.07±4.75 |

SPR: Sweet potato residues; FSPR: Sweet potato residues fermented under optimal process. Δ

and '': indicating flavor amino acids and essential amino acids, respectively; ΣAA: total amino acids; FAA<sup>Δ</sup>: total flavor amino acids; EAA<sup>'</sup>: total essential amino acids; NEAA: total non-essential amino acids.
